# Supplementary material for: Comparative Evolutionary and Developmental Dynamics of the Cotton (Gossypium hirsutum) Fiber Transcriptome
Source: PLoS Genet. 2014 Jan 2;10(1):e1004073. doi: 10.1371/journal.pgen.1004073 (PMC3879233; doi:10.1371/journal.pgen.1004073)
Supplement: Table S3 — Chromosomal distribution of differentially expressed genes on Cotton D genome. The first table is from comparison of development, and the second one is from domestication comparison within wild and domesticated cotton. Numbers in red indicates statistically over-represented chromosome based on Chi-square test (P<0.05). (XLSX) [file pgen.1004073.s011.xlsx]

## Sheet: Table S2
Table S3. Chromosomal distribution of differentially expressed genes on Cotton D genome. The first table is from comparison of development, and the second one is from domestication comparison within wild and domesticated cotton. Numbers in red indicates statistically over-represented chromosome based on Chi-square test (P < 0.05)
Chr	length (bp)	# genes	AD1 10 dpa (wild)		AD1 20 dpa (wild)		AD1 10 dpa (dom)		AD1 20 dpa (dom)
			# genes	%	# genes	%	# genes	%	# genes	%
1	55678711	2768	109	2.46579	169	2.73789	22	2.4158	132	4.46098
2	62758601	2689	108	2.51494	142	2.36806	27	3.05195	69	2.40038
3	45758218	1875	87	2.90545	114	2.72646	14	2.2695	50	2.49454
4	62173553	2943	113	2.40427	178	2.71222	19	1.96231	82	2.60643
5	64137711	2698	102	2.3673	159	2.64271	19	2.1405	87	3.01647
6	51073468	2754	129	2.93306	141	2.29589	32	3.53175	62	2.10596
7	60974818	3802	174	2.86571	219	2.58302	33	2.63819	93	2.2882
8	57128522	2990	122	2.55496	210	3.14951	24	2.43974	93	2.90961
9	70705631	4564	209	2.86745	308	3.02622	46	3.06349	138	2.8285
10	62168112	2570	101	2.46084	157	2.73944	20	2.36538	73	2.65713
11	62659606	2963	111	2.34578	181	2.73932	23	2.35939	71	2.24155
12	35427486	1880	90	2.99764	118	2.81462	24	3.88023	52	2.58743
13	58320000	2727	132	3.03099	126	2.07196	23	2.56358	65	2.22972
N		282	10	2.22048	8	1.27214	3	3.23353	2	0.663442
	Total	37505	1597	36.9346	2230	34.6073	329	37.9153	1069	34.8269
Chr	length (bp)	# genes	AD1 10 dpa (wild)		AD1 10 dpa (dom)		AD1 20 dpa (wild)		AD1 20 dpa (dom)
			# genes	%	# genes	%	# genes	%	# genes	%
1	55678711	2768	89	2.69741	126	2.67138	52	2.7385	84	4.48254
2	62758601	2689	86	2.68307	117	2.55344	53	2.87317	52	2.85643
3	45758218	1875	63	2.81879	102	3.19249	33	2.5656	46	3.62383
4	62173553	2943	86	2.4515	133	2.65211	44	2.17941	46	2.30876
5	64137711	2698	85	2.64302	122	2.65368	49	2.64746	51	2.79216
6	51073468	2754	83	2.52835	132	2.81281	36	1.90552	38	2.03813
7	60974818	3802	135	2.97883	161	2.4851	68	2.60719	65	2.5253
8	57128522	2990	92	2.58131	165	3.23849	64	3.12022	50	2.47008
9	70705631	4564	151	2.77559	230	2.95742	87	2.77875	78	2.52441
10	62168112	2570	73	2.38294	96	2.19214	45	2.55244	39	2.24152
11	62659606	2963	75	2.12351	120	2.37673	49	2.41068	45	2.24332
12	35427486	1880	61	2.72205	82	2.55968	47	3.64431	35	2.74993
13	58320000	2727	106	3.26095	112	2.41026	55	2.94004	46	2.49163
N		282	7	2.08244	6	1.24863	4	2.0677	2	1.04759
	Total	37505	1192	36.7298	1704	36.0044	686	37.031	677	36.3956

## Sheet: chi-squrare test
		AD1 wild 10dpa			AD1 dom 10dpa			AD1 wild 20dpa			AD1 dom 20dpa
Chr	expected	observed	(o-e)^2/e	expected	observed	(o-e)^2/e	expected	observed	(o-e)^2/e	expected	observed	(o-e)^2/e
1	87.9738	89	0.0119713	125.761	126	0.000453625	50.6292	52	0.037115	49.965	84	23.1839
2	85.463	86	0.00337481	122.172	117	0.218939	49.1842	53	0.296034	48.5389	52	0.24679
3	59.5921	63	0.194893	85.1886	102	3.3176	34.2954	33	0.0489316	33.8455	46	4.3649
4	93.5357	86	0.607112	133.712	133	0.00379229	53.8301	44	1.79511	53.1239	46	0.955307
5	85.749	85	0.00654225	122.581	122	0.00275166	49.3488	49	0.00246581	48.7014	51	0.108489
6	87.5288	83	0.234324	125.125	132	0.377739	50.3731	36	4.10113	49.7123	38	2.75942
7	120.837	135	1.66006	172.74	161	0.797871	69.542	68	0.0341909	68.6296	65	0.19196
8	95.0295	92	0.0965768	135.847	165	6.25605	54.6898	64	1.58495	53.9723	50	0.292353
9	145.055	151	0.243652	207.361	230	2.47176	83.4796	87	0.148454	82.3844	78	0.233336
10	81.6808	73	0.922579	116.765	96	3.69284	47.0076	45	0.0857405	46.3909	39	1.1775
11	94.1713	75	3.90289	134.621	120	1.58792	54.1959	49	0.498148	53.4849	45	1.34605
12	59.751	61	0.0261098	85.4158	82	0.1366	34.3869	47	4.6265	33.9357	35	0.0333762
13	86.6707	106	4.31083	123.898	112	1.14264	49.8793	55	0.525707	49.2249	46	0.211272
N	8.96264	7	0.429781	12.8124	6	3.62216	5.15803	4	0.25999	5.09036	2	1.87616
	1192	1192	12.6507	1704	1704	23.6291	686	686	14.0445	677	677	36.9808
p-value			0.4751			0.0347			0.3707			0.0004
	AD1 10 dpa (wild)				AD1 20 dpa (wild)			AD1 10 dpa (dom)			AD1 20 dpa (dom)
Chr	Expected	observed	(o-e)^2/e	Expected	observed	(o-e)^2/e	Expected	observed	(o-e)^2/e	Expected		(o-e)^2/e
1	117.864	109	0.666646	164.582	169	0.118607	24.2813	22	0.214344	78.8959	132	35.7438
2	114.5	108	0.369027	159.885	142	2.00055	23.5883	27	0.493437	76.6442	69	0.762405
3	79.8394	87	0.642225	111.485	114	0.0567299	16.4478	14	0.364289	53.4429	50	0.221795
4	125.316	113	1.21038	174.987	178	0.0518767	25.8165	19	1.7998	83.8839	82	0.042311
5	114.884	102	1.44481	160.42	159	0.0125638	23.6673	19	0.920412	76.9007	87	1.32632
6	117.268	129	1.17371	163.749	141	3.16052	24.1585	32	2.54521	78.4969	62	3.46698
7	161.893	174	0.905422	226.062	219	0.220619	33.3518	33	0.00371014	108.368	93	2.17936
8	127.317	122	0.222061	177.782	210	5.83876	26.2288	24	0.189388	85.2236	93	0.709579
9	194.34	209	1.10593	271.37	308	4.94447	40.0362	46	0.888383	130.087	138	0.481326
10	109.433	101	0.649875	152.809	157	0.114946	22.5445	20	0.287178	73.2524	73	0.000869443
11	126.167	111	1.82339	176.176	181	0.132076	25.9919	23	0.344399	84.454	71	2.1433
12	80.0523	90	1.23616	111.782	118	0.345834	16.4917	24	3.4184	53.5854	52	0.0469056
13	116.118	132	2.17215	162.144	126	8.05696	23.9217	23	0.0355123	77.7273	65	2.08401
N	12.0078	10	0.335732	16.7674	8	4.5843	2.47375	3	0.111951	8.03781	2	4.53546
	1597	1597	13.9575	2230	2230	29.6388	329	329	11.6164	1069	1069	53.7444
p-value			0.3768			0.0053			0.5593			<0.0001
