# Supplementary material for: Comparative Evolutionary and Developmental Dynamics of the Cotton (Gossypium hirsutum) Fiber Transcriptome
Source: PLoS Genet. 2014 Jan 2;10(1):e1004073. doi: 10.1371/journal.pgen.1004073 (PMC3879233; doi:10.1371/journal.pgen.1004073)
Supplement: Table S5 — Homoeolog-specific regulation of 3-ketoacyl-CoA synthase (KCS) genes in developing cotton fiber. Expression levels were normalized with RPKM. (XLSX) [file pgen.1004073.s013.xlsx]

## Sheet: Sheet1
Table S5. Homoeolog-specific regulation of 3-ketoacyl-CoA synthase (KCS) genes in developing cotton fiber. Expression levels were normalized with RPKM.
GoraiID	seq_description	dom10_At	dom10_Dt	homeolog regulation	Regulation at 10 dpa
Gorai.001G150900.1	3-ketoacyl-CoA synthase 1	0	0.103496
Gorai.004G149300.1	3-ketoacyl-CoA synthase 1	0.0501691	0.493332
Gorai.008G129800.1	3-ketoacyl-CoA synthase 1	53.9309	132.08	Dt_up
Gorai.006G069800.1	3-ketoacyl-CoA synthase 2	11.1853	28.802	Dt_up
Gorai.006G245000.1	3-ketoacyl-CoA synthase 2	469.354	210.135	At_up	dom > wild
Gorai.011G165200.1	3-ketoacyl-CoA synthase 2	194.94	161.413		dom > wild
Gorai.002G005600.1	3-ketoacyl-CoA synthase 4	0	0
Gorai.002G005700.1	3-ketoacyl-CoA synthase 4	0	0
Gorai.005G108000.1	3-ketoacyl-CoA synthase 4	2.69084	1.58887
Gorai.005G244100.1	3-ketoacyl-CoA synthase 4	4.46759	7.54918		dom > wild
Gorai.009G201600.1	3-ketoacyl-CoA synthase 4	16.6925	11.6833		dom > wild
Gorai.002G218500.1	3-ketoacyl-CoA synthase 6	920.238	1554.02		dom > wild
Gorai.006G065600.1	3-ketoacyl-CoA synthase 6	0	0
Gorai.007G009500.1	3-ketoacyl-CoA synthase 6	0	0
Gorai.002G005500.2	3-ketoacyl-CoA synthase 9	1.9695	5.49116	Dt_up
Gorai.010G093900.1	3-ketoacyl-CoA synthase 10	0.235473	4.98407
Gorai.013G221500.1	3-ketoacyl-CoA synthase 10	439.342	401.391
Gorai.004G278700.1	3-ketoacyl-CoA synthase 11	0.236222	0
Gorai.009G021000.1	3-ketoacyl-CoA synthase 11	17.0154	23.9554
Gorai.010G066800.4	3-ketoacyl-CoA synthase 11	39.9759	59.9664
Gorai.001G107300.1	3-ketoacyl-CoA synthase 12	11.2042	44.1296	Dt_up
Gorai.009G102300.1	3-ketoacyl-CoA synthase 12	528.967	218.74	At_up	dom > wild
Gorai.010G202800.1	3-ketoacyl-CoA synthase 19	74.1251	116.782
Gorai.011G245100.1	3-ketoacyl-CoA synthase 19	1.08353	3.22786
Gorai.011G249000.1	3-ketoacyl-CoA synthase 19	100.044	4.06055	At_up	dom > wild
Gorai.011G249100.1	3-ketoacyl-CoA synthase 19	3.69534	0	At_only	dom > wild
Gorai.011G249200.1	3-ketoacyl-CoA synthase 19	297.854	125.52	At_up	dom > wild
